# Supplementary material
Source: HighWire-hosted journal article supplement (https://heart.bmj.com/content/109/8/626)
Supplement: inline-supplementary-material-1 [file inline-supplementary-material-1.pdf]

**Supplemental Appendix:**

- p. 2-4      Supplemental Material S1: The OCVC-Heart Failure Investigators
- p. 5-6      Supplemental Methods
- p. 7-8      Supplemental Table S1: Patient characteristics on admission comparing the study cohort with patients who did not undergo RHC
- p. 9-10     Supplemental Table S2: Haemodynamic parameters associated with PH categories according to the 2015 ESC/ERS definition of PH
- p. 11      Supplemental Table S3: PH categories according to the 2022 ESC/ERS guidelines
- p. 12      Supplemental Figure S1: Prevalence of PH categories associated with RAP quartiles according to the 2015 ESC/ERS definition of PH
- p.13      Supplemental Figure S2: Kaplan–Meier curves for the prediction of all cause death and HF hospitalisation by PH categories according to the 2022 ESC/ERS definition of PH
- P. 14      References

**Supplemental Material S1: The OCVC-Heart Failure Investigators**

Chair: Yasushi Sakata, Department of Cardiovascular Medicine, Osaka University Graduate

School of Medicine, 2-2 Yamada-oka, Suita 565-0871, Japan

Secretariat: Shungo Hikoso (Chief), Daisaku Nakatani, Hiroya Mizuno, Shinichiro Suna,

Katsuki Okada, Tomoharu Dohi, Yohei Sotomi, Takayuki Kojima, Akihiro Sunaga, Hirota

Kida, Bolrathanak Oeun, and Taiki Sato; Department of Cardiovascular Medicine, Osaka

University Graduate School of Medicine, Suita, Japan.

**Investigators:**

Shunsuke Tamaki, Tetsuya Watanabe, and Takahisa Yamada, Osaka General Medical Center,

Osaka, Japan; Takaharu Hayashi and Yoshiharu Higuchi, Osaka Police Hospital, Osaka,

Japan; Masaharu Masuda, Mitsutoshi Asai, and Toshiaki Mano, Kansai Rosai Hospital,

Amagasaki, Japan; Hisakazu Fuji, Kobe Ekisaikai Hospital, Kobe, Japan; Daisaku Masuda,

Yoshihiro Takeda, Yoshiyuki Nagai, and Shizuya Yamashita, Rinku General Medical Center,

Izumisano, Japan; Masami Sairyo, Yusuke Nakagawa and Shuichi Nozaki, Kawanishi City

Hospital, Kawanishi, Japan; Haruhiko Abe, Yasunori Ueda, Masaaki Uematsu, and Yukihiro

Koretsune, National Hospital Organization Osaka National Hospital, Osaka, Japan; Kunihiro

Nagai, Ikeda Municipal Hospital, Ikeda, Japan; Masamichi Yano, Masami Nishino, and Jun

Tanouchi, Osaka Rosai Hospital, Sakai, Japan; Yoh Arita and Shinji Hasegawa, Japan  
Community Health Care Organization Osaka Hospital, Osaka, Japan; Takamaru Ishizu,  
Minoru Ichikawa and Yuzuru Takano, Higashiosaka City Medical Center, Higashiosaka,  
Japan; Eisai Rin, Kawachi General Hospital, Higashiosaka, Japan; Yukinori Shinoda and  
Shiro Hoshida, Yao Municipal Hospital, Yao, Japan; Masahiro Izumi, Kinki Central Hospital,  
Itami, Japan; Hiroyoshi Yamamoto and Hiroyasu Kato, Japan Community Health Care  
Organization, Osaka Minato Central Hospital, Osaka, Japan; Kazuhiro Nakatani and Yuji  
Yasuga, Sumitomo Hospital, Osaka, Japan; Mayu Nishio and Keiji Hirooka, Saiseikai Senri  
Hospital, Suita, Japan; Takahiro Yoshimura and Yoshinori Yasuoka, National Hospital  
Organization Osaka Minami Medical Center, Kawachinagano, Japan; Akihiro Tani, Kano  
General Hospital, Osaka, Japan; Yasushi Okumoto and Hideharu Akagi, Kinan Hospital,  
Tanabe, Japan; Yasunaka Makino, Hyogo Prefectural Nishinomiya Hospital, Nishinomiya,  
Japan; Toshinari Onishi and Katsuomi Iwakura, Sakurabashi Watanabe Hospital, Osaka,  
Japan; Nagahiro Nishikawa and Yoshiyuki Kijima, Japan Community Health Care  
Organization, Hoshigaoka Medical Center, Hirakata, Japan; Takashi Kitao and Hideyuki  
Kanai, Minoh City Hospital, Minoh, Japan; Wataru Shioyama and Masashi Fujita, Osaka  
International Cancer Institute, Osaka, Japan; Koichiro Harada, Suita Municipal Hospital,  
Suita, Japan; Masahiro Kumada and Osamu Nakagawa, Toyonaka Municipal Hospital,  
Toyonaka, Japan; Ryo Araki and Takayuki Yamada, Otemae Hospital, Osaka, Japan; Akito

Nakagawa and Yoshio Yasumura, Amagasaki Chuo Hospital, Amagasaki, Japan; and Taiki Sato, Akihiro Sunaga, Bolrathanak Oeun, Hirota Kida, Takayuki Kojima, Yohei Sotomi, Tomoharu Dohi, Kei Nakamoto, Katsuki Okada, Fusako Sera, Shinichiro Suna, Hidetaka Kioka, Tomohito Ohtani, Toshihiro Takeda, Daisaku Nakatani, Hiroya Mizuno, Shungo Hikoso, Yasushi Matsumura and Yasushi Sakata, Osaka University Graduate School of Medicine, Suita, Japan.

## **SUPPLEMENTARY METHODS**

### **Haemodynamic assessments**

Because right heart catheterisation (RHC) was not mandatory in the PURSUIT-HFpEF study, there was no standardized procedure protocol for RHC as a study, and the choice of sheath, catheter, and access site was at the discretion of individual hospitals and physicians.

Therefore, practice may differ. The following measurements were obtained: systolic, diastolic, and mean pulmonary artery pressures (sPAP, dPAP, and mPAP, respectively); pulmonary artery wedge pressure (PAWP); right atrial pressure (RAP); and cardiac output (CO). Generally, the midpoint between precordial level and bed surface level in the supine position was used to establish the zero value. The method to confirm the wedge position was chosen at the discretion of the performing physician. Mean PAWP was calculated over the entire cardiac cycle including V waves. In most patients, CO was measured using the thermodilution technique. In the case of missing values for thermodilution CO, measurements using the indirect Fick method were used for analysis. The diastolic pulmonary artery pressure gradient (DPG) was calculated as the difference between dPAP and PAWP.

Pulmonary vascular resistance (PVR) was calculated as  $(\text{mPAP} - \text{PAWP}) / \text{CO}$  and expressed as Wood unit.

### **Echocardiographic assessments**

Of 219 patients, echocardiographic data at discharge were not available in 3 patients (2 in non-PH group and 1 in Ipc-PH group). The number of patients with missing data for each echocardiographic variable in Table 2 was as follows: 19 patients for left ventricular (LV) volumetry by modified Simpson method; 2 for LV mass; 2 for early diastolic mitral inflow (E) velocity; 80 for late diastolic mitral inflow (A) velocity; 44 for deceleration time (DcT); 9 for medial early diastolic mitral annular tissue velocity ( $e'$ ); 13 for lateral  $e'$ ; 14 for  $E/e'$ ; 35 for right ventricular end-diastolic dimension (RVDD); 22 for tricuspid annular plane systolic excursion (TAPSE); 36 for TAPSE/SPAP.  $E/e'$  using mean value of medial and lateral  $e'$  was available for analysis in 147 patients in non-PH, 40 in Ipc-PH, 7 in precapillary PH, and 8 in Cpc-PH. SPAP was an estimate of systolic PAP on echocardiography: the sum of tricuspid regurgitant pressure gradient (TRPG) and an estimate of RAP obtained from the diameter and collapsibility of the inferior vena cava. RAP was estimated to be 3 mmHg when IVC diameter  $\leq 2.1$  cm that collapsed  $>50\%$  with a sniff, 15 mmHg when IVC diameter  $> 2.1$  cm that collapsed  $< 50\%$  with a sniff. When the IVC diameter and collapse rate did not meet any of above criteria, RAP was estimated to be 8 mmHg.<sup>1</sup>

**Table S1. Patient characteristics on admission comparing the study cohort with patients****who did not undergo RHC**

|                                  | <b>Patients who did not<br/>undergo RHC (n=634)</b> | <b>Study cohort<br/>(n=219)</b> | <b>p value*</b> |
|----------------------------------|-----------------------------------------------------|---------------------------------|-----------------|
| Age, years                       | 83 (77-88)                                          | 81 (75-85)                      | <0.001          |
| Male                             | 284 (45)                                            | 101 (46)                        | 0.753           |
| Hypertension                     | 533 (84)                                            | 190 (87)                        | 0.443           |
| Diabetes mellitus                | 200 (32)                                            | 83 (38)                         | 0.095           |
| Dyslipidaemia                    | 249 (40)                                            | 101 (47)                        | 0.079           |
| Coronary artery disease          | 123 (20)                                            | 43 (20)                         | 0.921           |
| eGFR, mL/min/1.73 m <sup>2</sup> | 43.7 (29.8-57.7)                                    | 44.7 (28.5-60.0)                | 0.803           |
| NT-pro-BNP, pg/mL                | 3090 (1658-5783)                                    | 4230 (1985-8020)                | 0.002           |
| LVDD, mm                         | 46 ± 6                                              | 47 ± 7                          | 0.053           |
| LV ejection fraction, %          | 61 ± 7                                              | 60 ± 7                          | 0.112           |
| Estimated SPAP                   | 43 (34-54)                                          | 44 (34-52)                      | 0.783           |
| SPAP > 35mmHg                    | 377 (72)                                            | 136 (71)                        | 0.926           |
| Initial HF treatment             |                                                     |                                 |                 |
| NIPPV usage                      | 57 (9)                                              | 54 (25)                         | <0.001          |

|                           |          |          |        |
|---------------------------|----------|----------|--------|
| Intubation                | 8 (1)    | 7 (3)    | 0.073  |
| Dobutamine                | 16 (3)   | 1 (0.5)  | 0.088  |
| Intravenous PDE3I         | 1 (0.2)  | 2 (0.9)  | 0.163  |
| Carperitide               | 150 (24) | 44 (20)  | 0.304  |
| Intravenous nitrates      | 132 (21) | 120 (55) | <0.001 |
| Intravenous CCB           | 31 (5)   | 44 (20)  | <0.001 |
| Diuretics (continuous iv) | 138 (22) | 143 (66) | <0.001 |
| Diuretics (bolus iv)      | 340 (54) | 132 (61) | 0.082  |

Values are shown as mean±SD, median (IQR) or n (%).

\* Analysis of variance or the Mann-Whitney test for continuous variables and the Fisher's exact test for categorical variables were used.

CCB, calcium channel blocker; eGFR, estimated glomerular filtration rate; HF, heart failure; iv, intravenous infusion; LV, left ventricular; LVDD, LV end-diastolic dimension; NIPPV, non-invasive positive pressure ventilation; NT-pro-BNP, N-terminal probrain natriuretic peptide; PDE3I, phosphodiesterase-3 inhibitor; RHC, right heart catheterization; SPAP, systolic pulmonary artery pressure estimated on echocardiography.



**Table S2.** Haemodynamic parameters associated with PH categories according to the 2015 ESC/ERS definition of PH

|                                | <b>Non-PH</b> | <b>Ipc-PH</b> | <b>Precapillary PH</b> | <b>Cpc-PH</b>  | <b>p value</b> |
|--------------------------------|---------------|---------------|------------------------|----------------|----------------|
|                                | <b>n=159</b>  | <b>n=44</b>   | <b>n=7</b>             | <b>n=9</b>     |                |
| Days from admission to RHC     | 11 (7-14)     | 10 (7-13)     | 13 (12-14)             | 12 (10-18)     | 0.238          |
| Heart rate, bpm                | 70 (61-78)    | 66 (59-75)    | 80 (57-98)             | 69 (60-90)     | 0.376          |
| Systolic blood pressure, mmHg  | 131 (118-147) | 135 (119-169) | 145 (133-154)          | 136 (102-142)  | 0.404          |
| Diastolic blood pressure, mmHg | 62 (53-70)    | 64 (50-73)    | 67 (50-80)             | 57 (52-61)     | 0.641          |
| Systolic PAP, mmHg             | 29 (24-33)    | 43 (38-49) *  | 46 (35-51) *           | 49 (38-65) *   | <0.001         |
| Diastolic PAP, mmHg            | 11 (8-14)     | 20 (16-22) *  | 18 (14-24) *           | 24 (20-27) *   | <0.001         |
| Mean PAP, mmHg                 | 18 (14-21)    | 28 (26-31) *  | 29 (26-31) *           | 30 (28-41) *   | <0.001         |
| PAWP, mmHg                     | 10 (7-13)     | 21 (18-25) *  | 14 (13-15) †           | 19 (16-24) *,‡ | <0.001         |
| RAP, mmHg                      | 5 (3-7)       | 10 (8-13) *   | 8 (7-10) *             | 10 (9-15) *    | <0.001         |

|                                     |               |               |                 |                    |        |
|-------------------------------------|---------------|---------------|-----------------|--------------------|--------|
| Cardiac output, L/min               | 3.8 (3.0-4.7) | 4.2 (3.7-5.1) | 4.5 (3.0-8.5)   | 3.2 (2.7-4.2)      | 0.057  |
| Cardiac index, L/min/m <sup>2</sup> | 2.5 (2.1-3.1) | 2.7 (2.3-3.2) | 3.5 (2.3-5.8)   | 2.4 (2.1-3.2)      | 0.206  |
| DPG, mmHg                           | 1 (-2-3)      | -3 (-6-2) *   | 5 (1-10) †      | 3 (-1-5)           | <0.001 |
| PVR, Wood units                     | 1.9 (1.2-2.6) | 1.7 (1.2-2.1) | 3.2 (2.2-3.7) † | 3.6 (3.1-4.6) *, † | <0.001 |

Values are shown as median (IQR).

\* p < 0.05 vs. non-PH, † p < 0.05 vs. Ipc-PH, ‡ p < 0.05 vs. Precapillary PH.

Bpm, beats per minute; Cpc-PH, combined postcapillary and precapillary pulmonary hypertension; DPG, diastolic pressure gradient; Ipc-PH, isolated postcapillary pulmonary hypertension; PAP, pulmonary artery pressure; PAWP, pulmonary artery wedge pressure; PH, pulmonary hypertension; PVR, pulmonary vascular resistance; RAP, right atrial pressure; RHC, right heart catheterisation.

**Table S3. PH categories according to the 2022 ESC/ERS guidelines**

| Categories according to the 2022 definition <sup>2</sup> |                                                            |
|----------------------------------------------------------|------------------------------------------------------------|
| Non-PH                                                   | mPAP $\leq$ 20 mmHg                                        |
| Precapillary PH                                          | mPAP $>$ 20 mmHg, PAWP $\leq$ 15 mmHg, and PVR $>$ 2 WU    |
| Ipc-PH                                                   | mPAP $>$ 20 mmHg, PAWP $>$ 15 mmHg, and PVR $\leq$ 2 WU    |
| Cpc-PH                                                   | mPAP $>$ 20 mmHg, PAWP $>$ 15 mmHg, and PVR $>$ 2 WU       |
| Unclassified PH                                          | mPAP $>$ 20 mmHg, PAWP $\leq$ 15 mmHg, and PVR $\leq$ 2 WU |

Cpc-PH, combined postcapillary and precapillary pulmonary hypertension; ESC/ERS, European Society of Cardiology/the European Respiratory Society; Ipc-PH, isolated postcapillary pulmonary hypertension; mPAP, mean pulmonary artery pressure; PAWP, pulmonary artery wedge pressure; PH, pulmonary hypertension; PVR, pulmonary vascular resistance; WU, Wood unit.

**Figure S1. Prevalence of PH categories associated with RAP quartiles according to the 2015 ESC/ERS definition of PH**

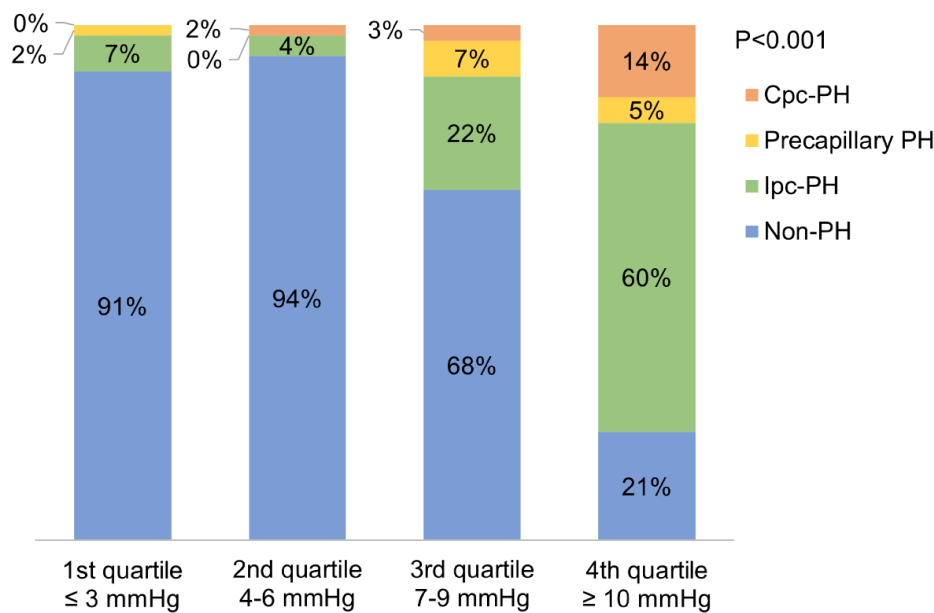

The prevalence of PH categories was significantly different across the RAP quartiles. The PH with the precapillary component was most frequently observed in the highest RAP quartile (19%). Cpc-PH, combined postcapillary and precapillary pulmonary hypertension; ESC/ERS, European Society of Cardiology/the European Respiratory Society; Ipc-PH, isolated postcapillary pulmonary hypertension; PH, pulmonary hypertension; RAP, right atrial pressure.

**Figure S2. Kaplan–Meier curves for the prediction of all cause death and HF hospitalisation by PH categories according to the 2022 ESC/ERS definition of PH**

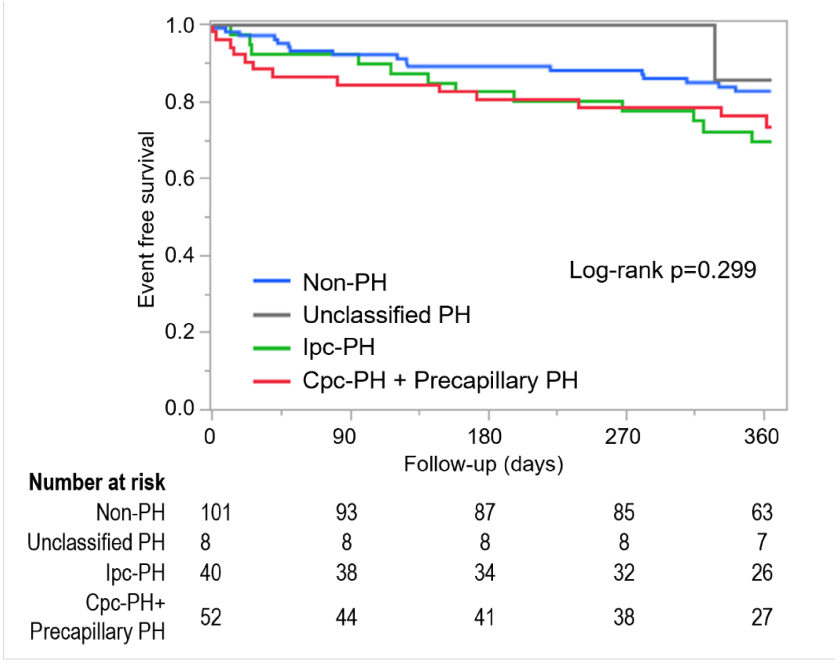

Applying the ESC/ERS 2022 definition, which adopts a lower threshold of PVR of > 2 Wood units for the definition of precapillary PH, clinical outcomes 1 year after discharge did not differ across the PH groups.

Cpc-PH, combined postcapillary and precapillary pulmonary hypertension; HF, heart failure; ESC/ERS, European Society of Cardiology/the European Respiratory Society; Ipc-PH, isolated postcapillary pulmonary hypertension; PH, pulmonary hypertension; PVR, pulmonary vascular resistance.

## References

1. Rudski LG, Lai WW, Afilalo J, et al. Guidelines for the echocardiographic assessment of the right heart in adults: a report from the American Society of Echocardiography endorsed by the European Association of Echocardiography, a registered branch of the European Society of Cardiology, and the Canadian Society of Echocardiography. *J Am Soc Echocardiogr* 2010;23:685-713; quiz 86-88.
2. Humbert M, Kovacs G, Hoeper MM, et al. 2022 ESC/ERS Guidelines for the diagnosis and treatment of pulmonary hypertension. *Eur Heart J* 2022;43:3618-731.
